# Supplementary material for: Reduced Alcohol Consumption and Major Adverse Cardiovascular Events Among Individuals With Previously High Alcohol Consumption
Source: PubMed Central journal article supplement (PMC10979316; doi:10.1001/jamanetworkopen.2024.4013), 2024-03-28
Supplement: jamanetwopen-e244013-s001.pdf [file jamanetwopen-e244013-s001.pdf]

## Supplemental Online Content

Kang DO, Lee DI, Roh SY, et al. Reduced alcohol consumption and major adverse cardiovascular events among individuals with previously high alcohol consumption. *JAMA Netw Open*. 2024;7(3):e244013. doi:10.1001/jamanetworkopen.2024.4013

**eMethods.** Potential Confounding Variables Included in the PSM Analysis

**eResults.** Sensitivity Analysis With Alternative PSM

**eTable 1.** Overall Process of Alcohol Consumption Calculation

**eTable 2.** Operational Definitions of Alcohol Consumption Levels, Confounding Variables and Primary Outcome

**eTable 3.** Subgroup Analysis of MACE Risk Between Reduced Drinking and Sustained Heavy Drinking Stratified by Washout Duration

**eTable 4.** Adjusted Hazards Ratios for Primary and Secondary Outcomes in Alternative PSM Analysis Excluding Modifiable Measurement Variables

### **eReferences**

This supplemental material has been provided by the authors to give readers additional information about their work.

## **eMethods.** Potential Confounding Variables Included in the PSM Analysis

To minimize the impact of potential confounders, propensity score-matching (PSM) analysis was performed using a logistic regression model with nearest neighbor method. The propensity score (PS) was calculated using the baseline covariates including age, sex, body mass index (BMI), obesity, systolic blood pressure (SBP), total cholesterol (TC), low-density lipoprotein cholesterol (LDL-C), hemoglobin, glucose, serum creatinine (sCr), alanine aminotransferase (ALT), smoking status, physical activity, hypertension, diabetes mellitus (DM), dyslipidemia, heart failure (HF), chronic kidney disease (CKD), atrial fibrillation (AF), modified Charlson Comorbidity Index (CCI), and income status.

## **eResults.** Sensitivity Analysis With Alternative PSM

We conducted an additional PSM analysis by excluding potentially modifiable variables influenced by change in alcohol consumption - such as measurements of blood pressure, lipid levels, blood glucose indices, hemoglobin, and renal and liver functional parameters (Supplementary Table 4). In this sensitivity analysis, the reduced drinking group consistently showed a significantly lower risk of major adverse cardiovascular events (MACE) than the sustained drinking group (PSM hazard ratios [HRs] [95% confidence interval (CI)]: 0.732 (0.639–0.839)). Reduced alcohol intake demonstrated a significant preventive association in the secondary outcome analysis, particularly for coronary artery disease (CAD), angina, any stroke, ischemic stroke and all-cause death (PSM-HRs [95% CI]: 0.690 [0.503–0.946], 0.695 [0.503–0.960], 0.686 [0.545–0.863], 0.624 [0.482–0.807], and 0.760 [0.630–0.918], respectively). These findings suggest that excluding modifiable measurement variables from the PS calculation and matching did not significantly alter the observed cardiovascular benefits associated with reduced alcohol consumption.

**eTable 1.** Overall Process of Alcohol Consumption Calculation

**Questionnaire of alcohol consumption habit in Korean National Insurance Service-Health**

**Screening (English translated version)**

Questions for alcohol consumption (2005–2008)

Q1) What is your drinking habit most likely?

① (Almost) never drink. ② Drink about 2-3 times a month. ③ Drink 1-2 times a week.

④ Drink 3-4 times a week. ⑤ Drink almost every day.

Q2) If you are drinking, how much do you consume in one occasion?

① Less than half a bottle of soju. ② One bottle of soju. ③ One and a half bottles of soju.

④ Two or more bottles of soju.

Questions for alcohol consumption (2009–2012)

Please read the questions below and fill in the information which corresponds to your current status.

Q1) On average, how many days a week do you drink?

0    1    2    3    4    5    6    7

Q2) How much do you usually drink a day when you drink (cup)? \_\_\_\_\_

(※ We count by each glass, regardless of the liquor type. One canned beer (355 cc) is equivalent to 1.6 cups of beer)

Note) Alcohol content was calculated by multiplying the drinking frequency by the number of standard drinks per serving. A standard drink in Korea, corresponding to one cup of each alcohol type, contains

seven grams of alcohol.<sup>1-3</sup> The Ministry of Health and Welfare of Republic of Korea has defined standard drink as seven grams of pure alcohol content for Soju and beer in 2020.<sup>1</sup> Moreover, the Korean Customs Service and Korean Alcohol Liquor Industry Association provided that Soju and beer were the most commonly consumed liquors in the Republic of Korea.<sup>2</sup>

### **Reference**<sup>1-3</sup>

1. Action plan for the prevention of harmful effects of drinking in South Korea ([http://ilovegb.kr/new2019/download/policy\\_2020\\_03.pdf](http://ilovegb.kr/new2019/download/policy_2020_03.pdf))
2. Korean Customs Service and Korean Alcohol Liquor Industry Association (<http://www.kalia.or.kr>)
3. Lee SR, Choi EK, Jung JH, Han KD, Oh S, Lip GYH. Lower risk of stroke after alcohol abstinence in patients with incident atrial fibrillation: a nationwide population-based cohort study. *Eur Heart J.* 2021;42(46):4759-68.

**eTable 2.** Operational Definitions of Alcohol Consumption Levels, Confounding Variables and Primary Outcome

| Category                          | ICD-10 codes and definitions                           | Assessment period                    |
|-----------------------------------|--------------------------------------------------------|--------------------------------------|
| <b>Alcohol consumption levels</b> |                                                        |                                      |
| <b>Heavy</b>                      | Men: >4 drinks (56 g)/day or >14 drinks (196 g)/week   | First and second health examinations |
|                                   | Women: >3 drinks (42 g)/day or >7 (98 g) drinks/week   |                                      |
| <b>Moderate</b>                   | Men: ≤4 drinks (56 g)/day and ≤14 drinks (196 g)/week  |                                      |
|                                   | Women: ≤3 drinks (42 g)/day and ≤7 drinks (98 g)/week  |                                      |
| <b>None</b>                       | None: 0 g                                              |                                      |
| <b>Confounding variables</b>      |                                                        |                                      |
| <b>Smoking status</b>             | Current smoker / past smoker / non-smoker              | Index date                           |
| <b>Obesity</b>                    | Underweight: <18.5 kg/m <sup>2</sup>                   | Index date                           |
|                                   | Normal to overweight: ≥18.5 to <25.0 kg/m <sup>2</sup> |                                      |
|                                   | Obesity: ≥25.0 kg/m <sup>2</sup>                       |                                      |
| <b>Physical activity</b>          | Insufficiently active: 0–499 MET-minutes/week          | Index date                           |
|                                   | Active: 500–1000 MET-minutes/week                      |                                      |

|                               |                                                                                                                     |                       |
|-------------------------------|---------------------------------------------------------------------------------------------------------------------|-----------------------|
|                               | Highly active: $\geq 1,000$ MET-minutes/week                                                                        |                       |
| <b>Income status</b>          | Low level: $\leq 30^{\text{th}}$ percentile                                                                         | Index date            |
|                               | Middle level: $> 30^{\text{th}}$ to $\leq 70^{\text{th}}$ percentile                                                |                       |
|                               | High level: $> 70^{\text{th}}$ percentile                                                                           |                       |
| <b>Hypertension</b>           | I10-13, Admission or outpatient consultation $\geq 1$ ; relevant medical history reported in the self-questionnaire | Between 2005 and 2013 |
| <b>Diabetes mellitus</b>      | E11-14, Admission or outpatient consultation $\geq 1$ ; relevant medical history reported in the self-questionnaire | Between 2005 and 2013 |
| <b>Dyslipidaemia</b>          | E78, Admission or outpatient consultation $\geq 1$ ; relevant medical history reported in the self-questionnaire    | Between 2005 and 2013 |
| <b>Heart failure</b>          | I50, Admission or outpatient consultation $\geq 1$ ; relevant medical history reported in the self-questionnaire    | Between 2005 and 2013 |
| <b>Atrial fibrillation</b>    | I48, Admission or outpatient consultation $\geq 1$ ; relevant medical history reported in the self-questionnaire    | Between 2005 and 2013 |
| <b>Chronic kidney disease</b> | eGFR $< 60$ mL/min/1.73 m <sup>2</sup>                                                                              | Index date            |

eGFR is calculated using the Chronic Kidney Disease–Epidemiology Collaboration equation as follows:  $eGFR = 141 \times \min(Scr/\kappa, 1)^a \times \max(Scr/\kappa, 1)^{-1.209} \times 0.993^{Age} \times 1.018$  [if female]  $\times 1.159$  [if black]

**Modified CCI**

Excluding MI and cerebrovascular disease from the original scoring system<sup>4</sup> Between 2005 and 2013

**Primary outcome**

**Major adverse cardiovascular events** Coronary artery disease; non-fatal MI (I21-I22) or angina (I200, I208-I209, I248-I1251, I255-I256, and I258-I259) undergoing revascularization therapy (M6551, M6552, M6561, M6562, M6563, M6564, M6571, M6572, M6633, M6634, O1641, O1642, O1647, OA641, OA642, and OA647)  
 Any stroke; ischemic stroke (I63) or hemorrhagic stroke (I60-62) accompanied by hospitalization  
 All-cause death

---

Index date refers to the final examination date in the second period (years 2009-2012). Abbreviations: AF, atrial fibrillation; eGFR, estimated glomerular filtration rate; CAD, coronary artery disease; CCI, Charlson comorbidity index; MET, metabolic equivalent of task; MI, myocardial infarction; sCr, serum creatinine

**eTable 3.** Subgroup Analysis of MACE Risk Between Reduced Drinking and Sustained Heavy Drinking Stratified by Washout Duration

|                       | Reduced drinking<br>(event / number) | Sustained heavy drinking<br>(event / number) | PSM-HR*<br>(95% CI) | P <sub>interaction</sub> |
|-----------------------|--------------------------------------|----------------------------------------------|---------------------|--------------------------|
| <b>Washout period</b> |                                      |                                              |                     | 0.498                    |
| Washout < 2 years     | 201 / 4,422                          | 237 / 4,196                                  | 0.803 (0.665–0.969) |                          |
| Washout ≥ 2 years     | 153 / 2,369                          | 231 / 2,595                                  | 0.729 (0.594–0.894) |                          |

Adjusted hazard ratios are calculated using multivariate Cox proportional hazards regression models after PSM. \*Adjusted for age, sex, BMI, obesity, SBP, TC, LDL-C, hemoglobin, glucose, creatinine, ALT, smoking status, physical activity, hypertension, DM, dyslipidemia, HF, CKD, AF, Modified CCI, and income status.

Abbreviations: AF, atrial fibrillation; ALT, alanine aminotransferase; BMI, body mass index; CCI, Charlson Comorbidity Index; CI, confidence interval; CKD, chronic kidney disease; DM, diabetes mellitus; HF, heart failure; HR, hazard ratio; LDL-C, low-density lipoprotein cholesterol; MACE, major adverse cardiovascular events; PSM, propensity score-matching; SBP, systolic blood pressure; TC, total cholesterol

**eTable 4.** Adjusted Hazards Ratios for Primary and Secondary Outcomes in Alternative PSM Analysis Excluding Modifiable Measurement Variables

|              |           | Number | Events | Person-years | Incidence rate<br>(per 100,000<br>person-years) | PSM-HR*<br>(95% CI) |
|--------------|-----------|--------|--------|--------------|-------------------------------------------------|---------------------|
| <b>MACE</b>  | Sustained | 6,791  | 490    | 52,606       | 931                                             | 1 (Reference)       |
|              | Reduced   | 6,791  | 354    | 52,382       | 675                                             | 0.732 (0.639–0.839) |
| <b>CAD</b>   | Sustained | 6,791  | 95     | 53,022       | 179                                             | 1 (Reference)       |
|              | Reduced   | 6,791  | 65     | 52,691       | 123                                             | 0.690 (0.503–0.946) |
| Non-fatal MI | Sustained | 6,791  | 35     | 53,221       | 66                                              | 1 (Reference)       |
|              | Reduced   | 6,791  | 22     | 52,836       | 42                                              | 0.641 (0.376–1.092) |
| Angina       | Sustained | 6,791  | 90     | 53,035       | 170                                             | 1 (Reference)       |
|              | Reduced   | 6,791  | 62     | 52,699       | 118                                             | 0.695 (0.503-0.960) |

|                        |           |       |     |        |     |                     |
|------------------------|-----------|-------|-----|--------|-----|---------------------|
| <b>Any stroke</b>      | Sustained | 6,791 | 180 | 52,890 | 340 | 1 (Reference)       |
|                        | Reduced   | 6,791 | 122 | 52,581 | 232 | 0.686 (0.545–0.863) |
| Hemorrhagic stroke     | Sustained | 6,791 | 36  | 53,267 | 68  | 1 (Reference)       |
|                        | Reduced   | 6,791 | 32  | 52,819 | 61  | 0.910 (0.565–1.466) |
| Ischemic stroke        | Sustained | 6,791 | 152 | 52,934 | 287 | 1 (Reference)       |
|                        | Reduced   | 6,791 | 94  | 52,643 | 179 | 0.624 (0.482–0.807) |
| <b>All-cause death</b> | Sustained | 6,791 | 255 | 53,321 | 478 | 1 (Reference)       |
|                        | Reduced   | 6,791 | 189 | 52,382 | 357 | 0.760 (0.630–0.918) |

Adjusted hazard ratios are calculated using multivariate Cox proportional hazards regression models after PSM. Incidence rates are displayed per 100,000 person-years. \* Adjusted for age, sex, BMI, obesity, smoking status, physical activity, hypertension, DM, dyslipidemia, HF, CKD, AF, Modified CCI, and income status.

Abbreviations: AF, atrial fibrillation; BMI, body mass index; CCI, Charlson Comorbidity Index; CI, confidence interval; CKD, chronic kidney disease; DM, diabetes mellitus; HF, heart failure; HR, hazard ratio; MACE, major adverse cardiovascular events; MI, myocardial infarction

## eReferences

1. Welfare MoHa. Action plan for the prevention of harmful effects of drinking in South Korea. Published 2019 Accessed. [http://ilovegb.kr/new2019/download/policy\\_2020\\_03.pdf](http://ilovegb.kr/new2019/download/policy_2020_03.pdf)
2. Association KALI. Korean Alcohol Liquor Industry Association Accessed. <http://www.kalia.or.kr>
3. Lee SR, Choi EK, Jung JH, Han KD, Oh S, Lip GYH. Lower risk of stroke after alcohol abstinence in patients with incident atrial fibrillation: a nationwide population-based cohort study. *Eur Heart J*. 2021;42(46):4759-4768. doi:10.1093/eurheartj/ehab315
4. Charlson ME, Pompei P, Ales KL, MacKenzie CR. A new method of classifying prognostic comorbidity in longitudinal studies: development and validation. *J Chronic Dis*. 1987;40(5):373-383. doi:10.1016/0021-9681(87)90171-8
